# Supplementary material for: Synthesis, characterization, and inhibition effects of a novel eugenol derivative bearing pyrrole functionalities on the corrosion of mild steel in a HCl acid solution
Source: Royal Society of Chemistry journal article supplement (doi:10.1039/d4ra01337a), 2024-01-01

## $^1\text{H}$ NMR and $^{13}\text{C}$ NMR spectra of the synthesised compounds

### ➤ Proton NMR of compound 2 : ethyl 2-(4-allyl-2-methoxyphenoxy)acetate

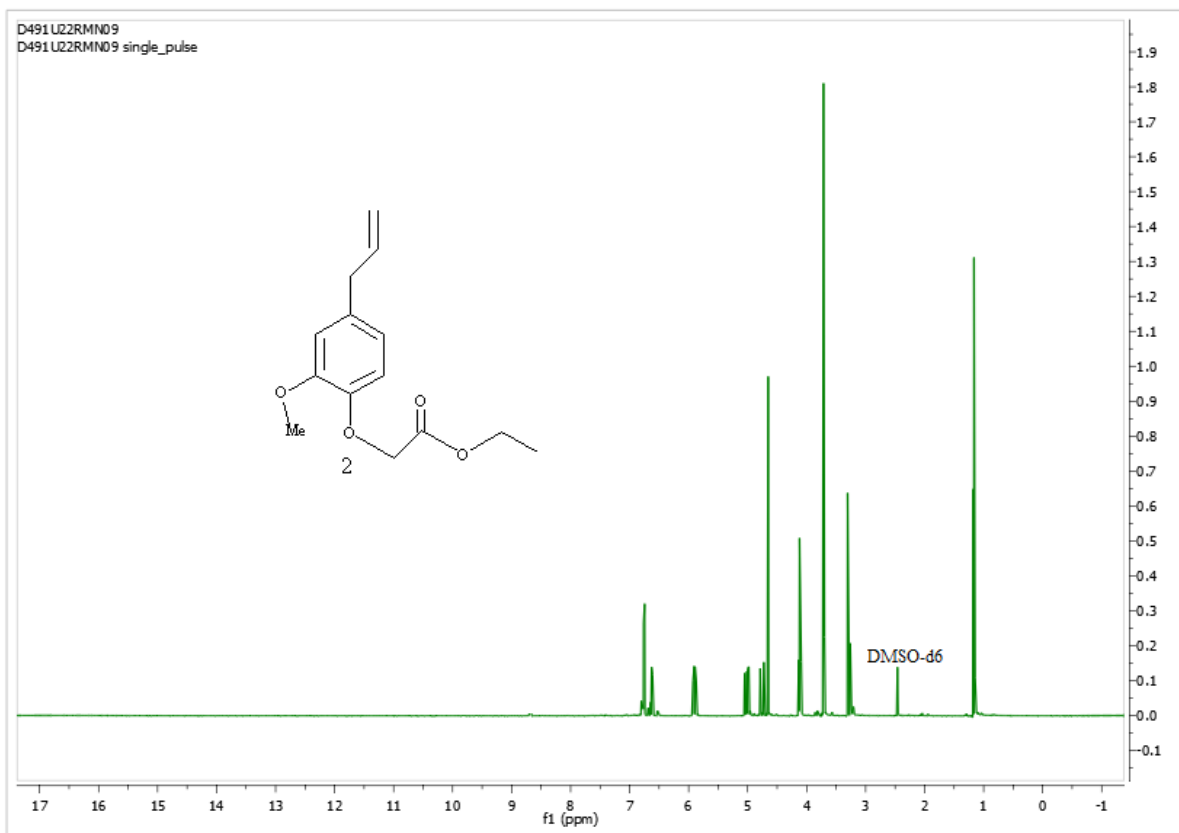

### ➤ Carbon NMR of compound 2 : ethyl 2-(4-allyl-2-methoxyphenoxy)acetate

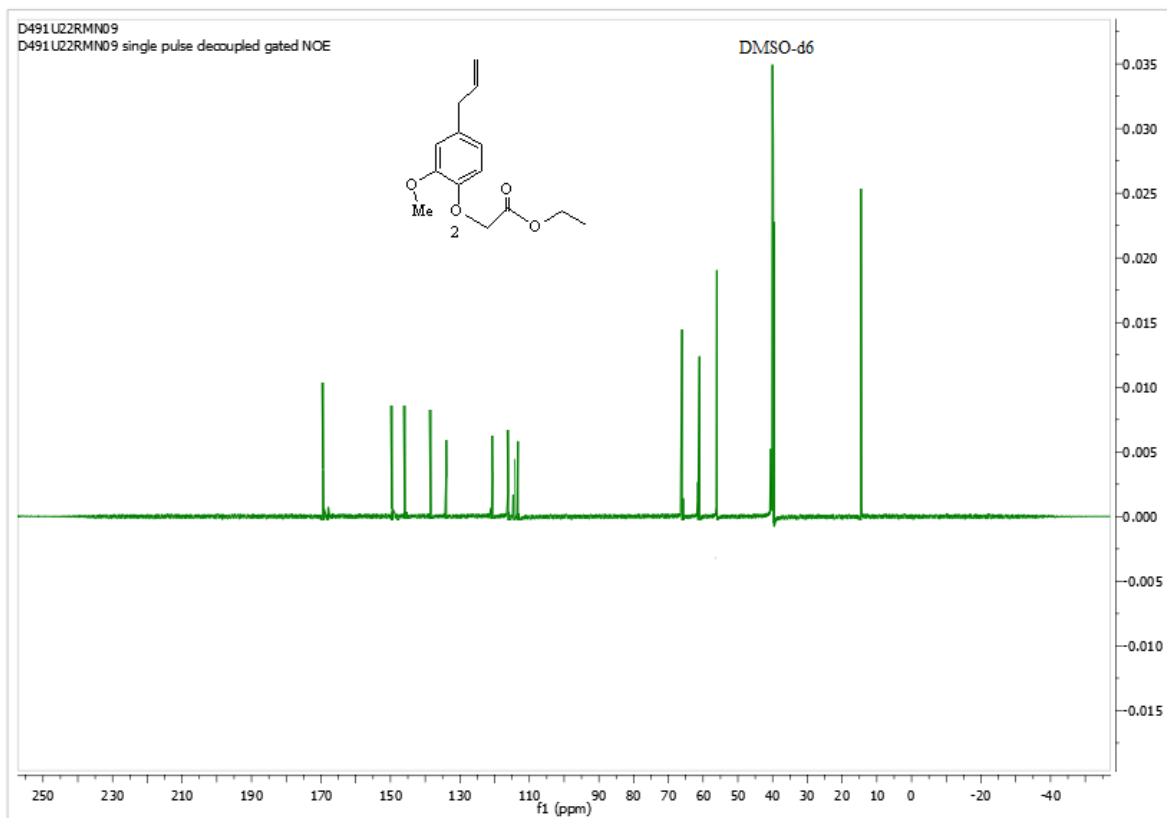

➤ Proton NMR of compound 3 : 2-(4-allyl-2-methoxyphenoxy)acetohydrazide

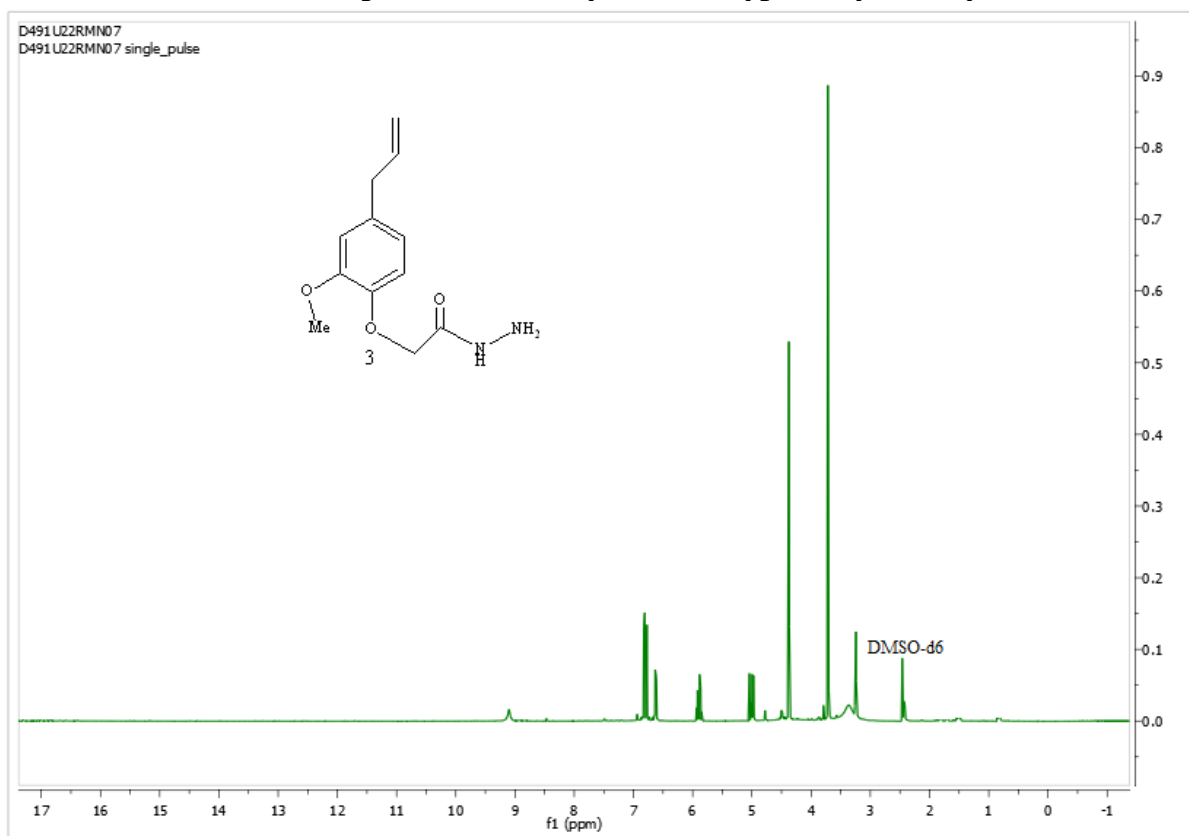

➤ Carbon NMR of compound 3 : 2-(4-allyl-2-methoxyphenoxy)acetohydrazide

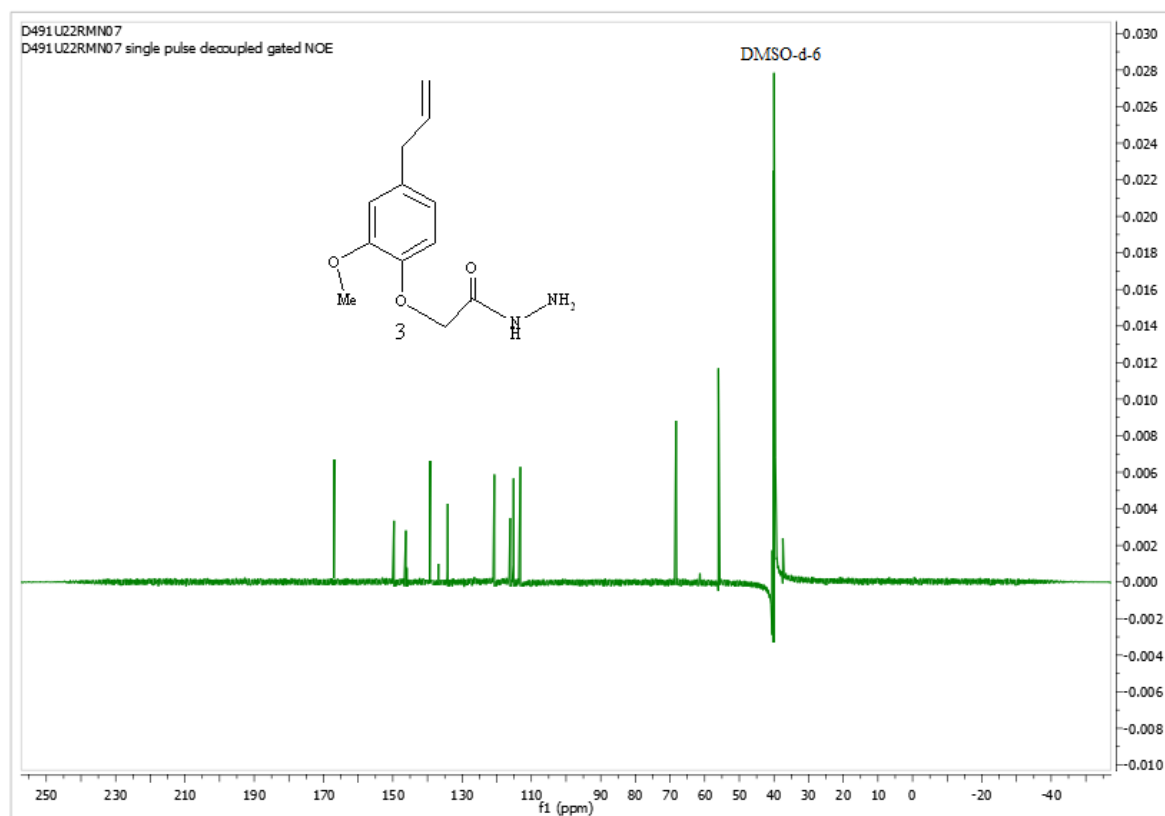

➤ Proton NMR of compound 4 : 2-(4-allyl-2-methoxyphenoxy)-N-(2,5-dimethyl-1H-pyrrol-1-yl)acetamide

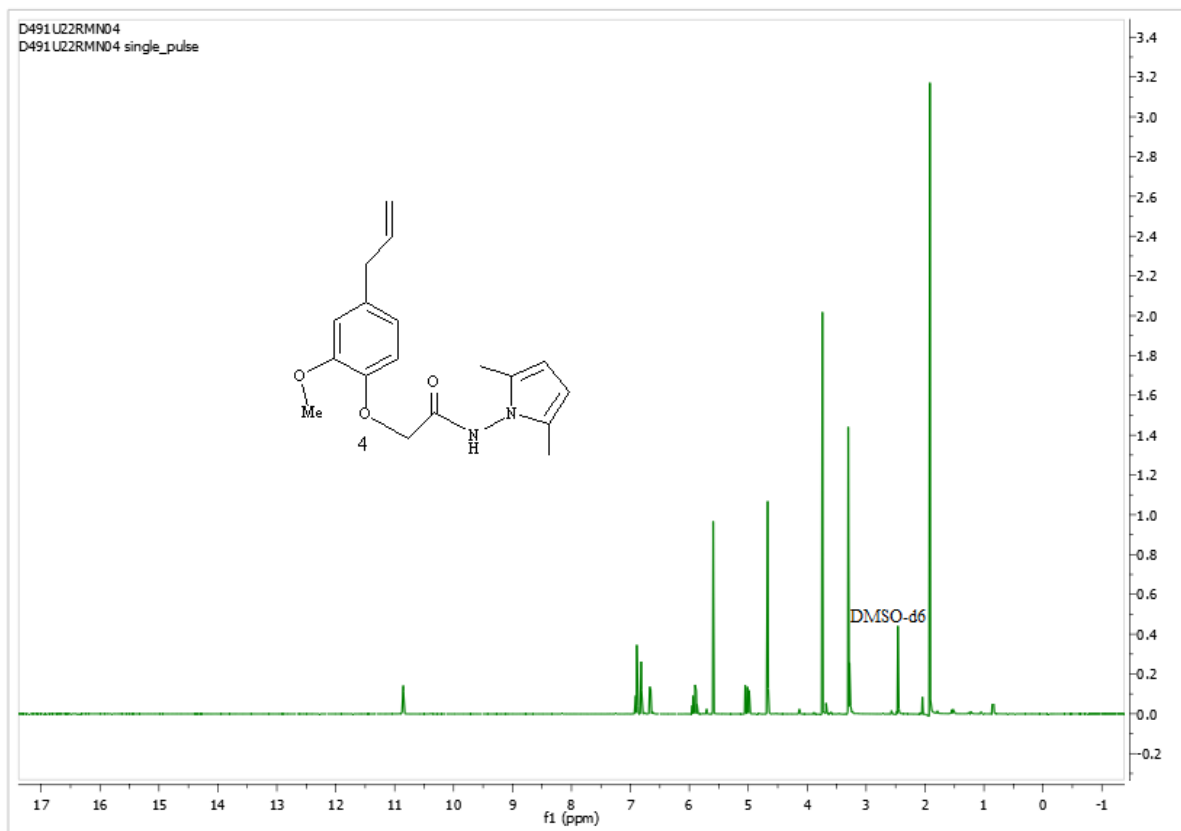

➤ Carbon NMR of compound 4 : 2-(4-allyl-2-methoxyphenoxy)-N-(2,5-dimethyl-1H-pyrrol-1-yl)acetamide

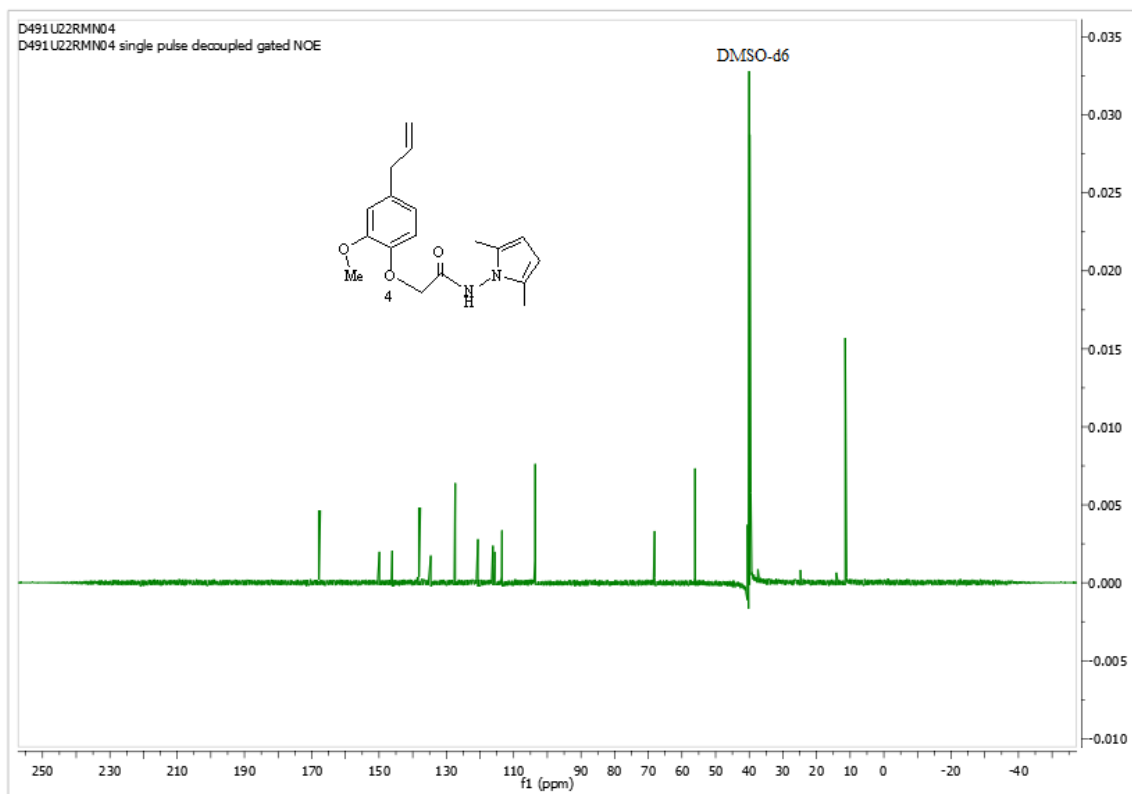

Supplement: d4ra01337a1.pdf [file d4ra01337a1.pdf]
